# Supplementary material for: Enhanced preservation of vacuum-packaged Atlantic salmon by hyperbaric storage at room temperature versus refrigeration
Source: PubMed Central journal article supplement (PMC7814072; doi:10.1038/s41598-021-81047-4), 2021-01-18
Supplement: 41598_2021_81047_MOESM1_ESM.pdf [file 41598_2021_81047_MOESM1_ESM.pdf]

**Enhanced preservation of vacuum-packaged Atlantic salmon by hyperbaric storage at room temperature versus refrigeration**

Liliana G. Fidalgo<sup>1</sup>, Mário M. Q. Simões<sup>1</sup>, Susana Casal<sup>2</sup>, José A. Lopes-da-Silva<sup>1</sup>, Ivonne Delgadillo<sup>1</sup>, Jorge A. Saraiva<sup>1\*</sup>

## Supplementary Table

**Table 1S** – Fatty acids (FA) profile (wt.%, g FA/100 g of total lipids) along storage of Atlantic salmon stored at 75 MPa/25 °C, AP/5 °C and AP/25 °C for different storage times. Different letters along each row denote significant differences ( $p < 0.05$ ) and absence of letters indicates not statistically significant differences.

| Free fatty acids <sup>(1)</sup> | 75 MPa/25 °C                   |                                 |                                 | AP/5 °C                         |                                 | AP/25 °C                       |
|---------------------------------|--------------------------------|---------------------------------|---------------------------------|---------------------------------|---------------------------------|--------------------------------|
|                                 | 5 days                         | 15 days                         | 30 days                         | 5 days                          | 15 days                         | 5 days                         |
| <i>C14:0</i>                    | 1.27 ± 0.13                    | 1.17 ± 0.06                     | 1.05 ± 0.19                     | 1.01 ± 0.10                     | 1.30 ± 0.14                     | 1.14 ± 0.02                    |
| <i>C16:0</i>                    | 8.71 ± 0.61                    | 8.24 ± 0.50                     | 7.15 ± 1.41                     | 6.78 ± 0.97                     | 7.37 ± 0.16                     | 7.86 ± 1.29                    |
| <i>C18:0</i>                    | 1.57 ± 1.14                    | 2.06 ± 0.12                     | 1.82 ± 0.30                     | 1.84 ± 0.18                     | 1.91 ± 0.20                     | 2.02 ± 0.35                    |
| <b>∑ SFA</b>                    | <b>11.55 ± 1.02</b>            | <b>11.47 ± 0.58</b>             | <b>10.02 ± 1.90</b>             | <b>9.62 ± 1.17</b>              | <b>10.57 ± 0.36</b>             | <b>10.01 ± 2.08</b>            |
| <i>C16:1n-7</i>                 | 1.59 ± 0.24                    | 1.57 ± 0.13                     | 1.22 ± 0.16                     | 1.34 ± 0.09                     | 1.68 ± 0.12                     | 1.49 ± 0.09                    |
| <i>C18:1n-7</i>                 | 3.70 ± 0.31                    | 3.09 ± 0.11                     | 2.99 ± 1.09                     | 3.34 ± 0.76                     | 3.54 ± 0.81                     | 3.76 ± 0.14                    |
| <i>C18:1n-9</i>                 | 28.06 ± 3.29                   | 29.80 ± 1.62                    | 28.59 ± 1.06                    | 29.69 ± 3.20                    | 31.47 ± 5.33                    | 28.53 ± 1.97                   |
| <i>C20:1n-9</i>                 | 4.79 ± 0.23                    | 4.46 ± 0.15                     | 3.90 ± 0.70                     | 4.36 ± 0.55                     | 4.89 ± 0.74                     | 4.62 ± 0.67                    |
| <i>C22:1n-9</i>                 | 0.80 ± 0.13                    | 0.71 ± 0.02                     | 0.71 ± 0.18                     | 0.66 ± 0.11                     | 0.80 ± 0.21                     | 0.76 ± 0.04                    |
| <b>∑ MUFA</b>                   | <b>38.94 ± 4.13</b>            | <b>39.63 ± 1.83</b>             | <b>37.42 ± 1.09</b>             | <b>39.39 ± 4.40</b>             | <b>42.38 ± 6.64</b>             | <b>37.72 ± 2.76</b>            |
| <i>C20:4n-3</i>                 | 0.76 ± 0.04                    | 0.74 ± 0.07                     | 0.64 ± 0.05                     | 0.66 ± 0.06                     | 0.71 ± 0.08                     | 0.72 ± 0.13                    |
| <i>C20:5n-3 (EPA)</i>           | 2.24 ± 0.29                    | 2.12 ± 0.12                     | 1.86 ± 0.36                     | 1.80 ± 0.27                     | 1.90 ± 0.05                     | 2.01 ± 0.46                    |
| <i>C22:5n-3</i>                 | 0.94 ± 0.12                    | 0.93 ± 0.04                     | 0.86 ± 0.16                     | 0.90 ± 0.08                     | 0.95 ± 0.07                     | 0.87 ± 0.11                    |
| <i>C22:6n-3 (DHA)</i>           | 5.39 ± 0.41 <sup>a</sup>       | 4.93 ± 0.34 <sup>ab</sup>       | 4.24 ± 0.92 <sup>abc</sup>      | 4.21 ± 0.65 <sup>abc</sup>      | 3.52 ± 0.32 <sup>bc</sup>       | 3.23 ± 0.55 <sup>c</sup>       |
| <b>∑ n-3 PUFA</b>               | <b>9.33 ± 0.76<sup>a</sup></b> | <b>8.72 ± 0.40<sup>ab</sup></b> | <b>7.59 ± 1.48<sup>ab</sup></b> | <b>7.57 ± 0.99<sup>ab</sup></b> | <b>7.08 ± 0.40<sup>ab</sup></b> | <b>6.31 ± 1.26<sup>b</sup></b> |
| <i>C18:2n-6</i>                 | 9.49 ± 0.50                    | 8.87 ± 0.27                     | 7.78 ± 1.25                     | 8.35 ± 1.10                     | 9.86 ± 1.49                     | 9.11 ± 0.69                    |
| <i>C20:2n-6</i>                 | 0.97 ± 0.03                    | 0.92 ± 0.04                     | 0.83 ± 0.15                     | 0.89 ± 0.06                     | 0.99 ± 0.11                     | 0.93 ± 0.05                    |
| <i>C22:2n-6</i>                 | 2.31 ± 0.08                    | 2.24 ± 0.18                     | 2.02 ± 0.21                     | 2.14 ± 0.10                     | 2.43 ± 0.42                     | 2.16 ± 0.18                    |
| <b>∑ n-6 PUFA</b>               | <b>12.77 ± 0.59</b>            | <b>12.02 ± 0.48</b>             | <b>10.63 ± 1.60</b>             | <b>11.37 ± 1.25</b>             | <b>13.28 ± 2.00</b>             | <b>11.26 ± 1.76</b>            |
| <b>PUFA/SFA</b>                 | <b>1.93 ± 0.22</b>             | <b>1.81 ± 0.10</b>              | <b>1.82 ± 0.04</b>              | <b>1.97 ± 0.06</b>              | <b>1.92 ± 0.14</b>              | <b>1.77 ± 0.07</b>             |
| <b>n-6/n-3 ratio</b>            | <b>1.38 ± 0.16</b>             | <b>1.38 ± 0.10</b>              | <b>1.41 ± 0.08</b>              | <b>1.51 ± 0.09</b>              | <b>1.88 ± 0.30</b>              | <b>1.79 ± 0.14</b>             |

(1) SFA: total saturated fatty acid; MUFA: monounsaturated fatty acid; PUFA: polyunsaturated fatty acid; EPA: Eicosapentaenoic acid; DHA: Docosahexaenoic acid.
